# Supplementary material
Source: Springer Nature journal article supplement (https://www.springermedizin.de/resource/supplementary/13049_2014_758_MOESM2_ESM.pdf/9667236)

# Mean Jugular Venous Pressure values of each subject

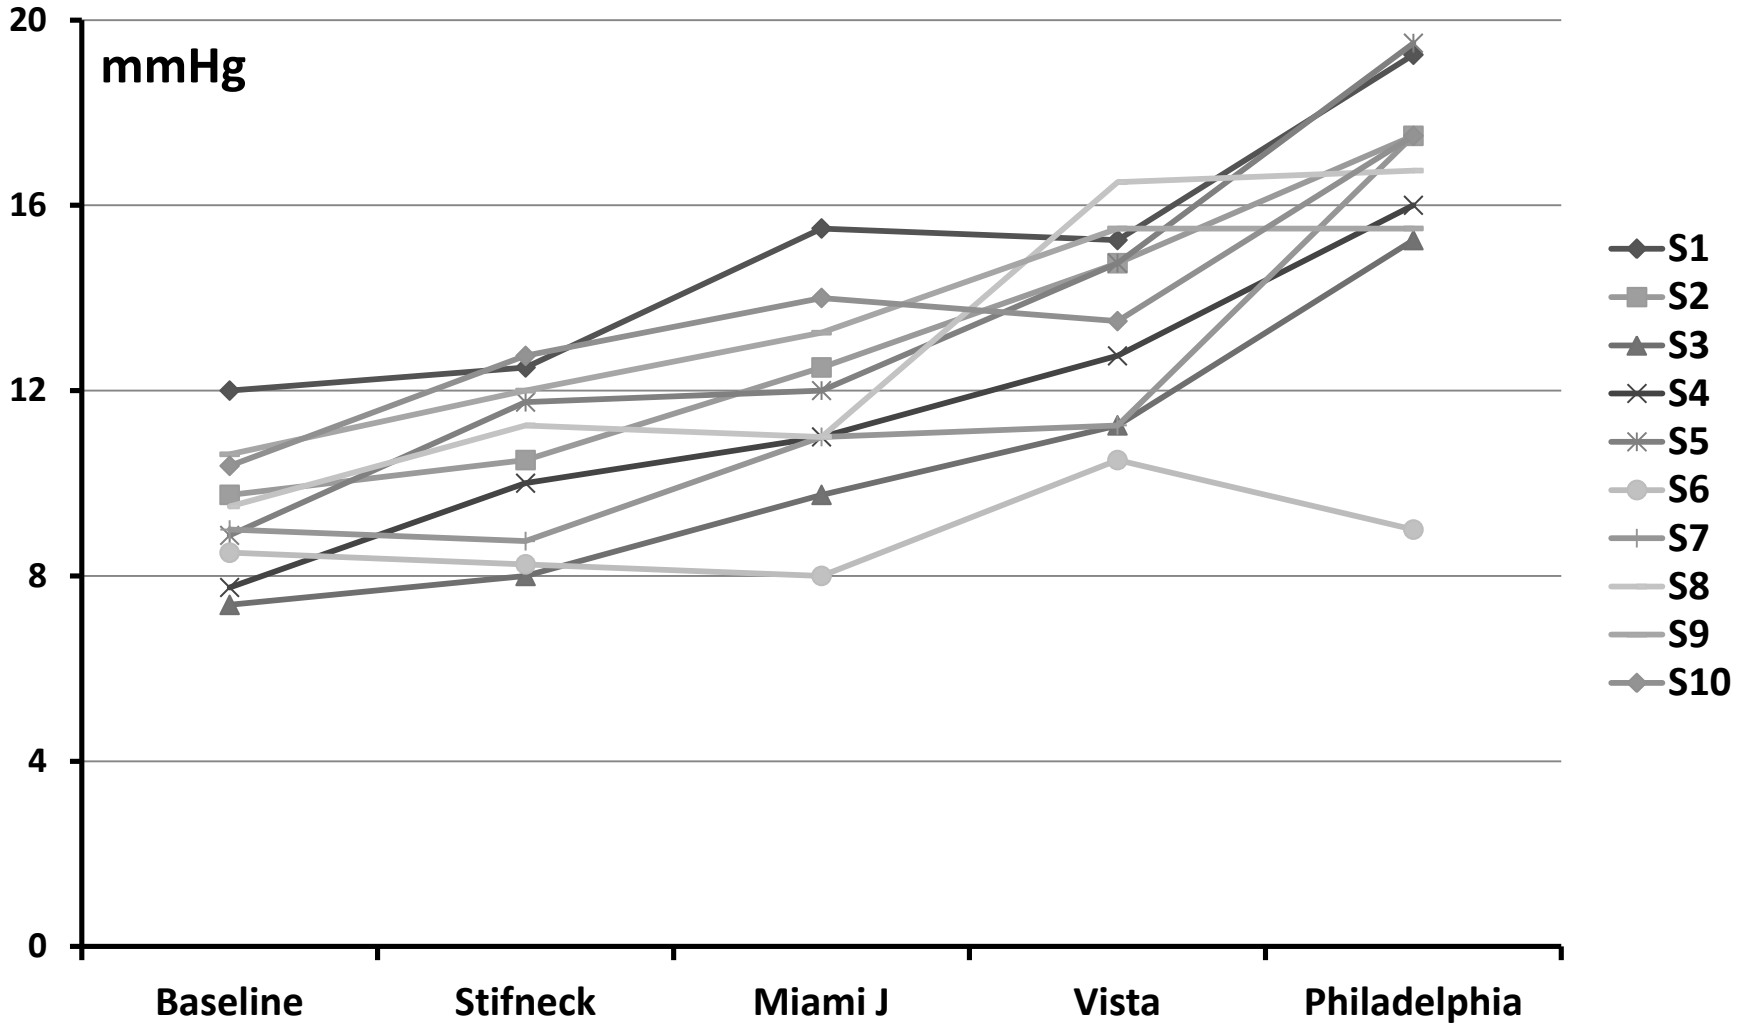

Supplement: MOESM2 [file 9667236]
